# Supplementary material for: Transmission Cycle of Tick-Borne Infections and Co-Infections, Animal Models and Diseases
Source: MDPI journal article supplement (doi:10.3390/pathogens11111309), 2022-11-08
Supplement: s1 [file s1]

**Supplementary Table S1.** TBCI prevalence in engorged ticks in Romania

| <b>Pathogens combination</b>                                            | <b>No. of Ticks <sup>a</sup></b> | <b>Prevalence(%)</b> |
|-------------------------------------------------------------------------|----------------------------------|----------------------|
| <i>Borrelia</i> spp. + Ap + <i>Rickettsia</i> spp.                      | 42                               | 18.92                |
| <i>Borrelia</i> spp. + Ap + <i>R. helvetica</i> + <i>Theileria</i> spp. | 2                                | 0.90                 |
| <i>Bo. Afzelli</i> + Ap                                                 | 20                               | 9.01                 |
| <i>Bo. garini</i> + Ap                                                  | 7                                | 3.15                 |
| Bo. bavar/ <i>Bo. garini</i> + Ap                                       | 1                                | 0.45                 |
| <i>Bo. Afzelli/B.valaisiana</i> + <i>Rickettsia</i> spp                 | 2                                | 0.90                 |
| <i>Bo. Myiamotoi</i> + Ap                                               | 2                                | 0.90                 |
| <i>Bo. bavar/ Bo. Garinii</i> + Ap + Neo.mik                            | 1                                | 0.45                 |
| Ap + <i>R.helvetica</i>                                                 | 22                               | 9.91                 |
| Ap + <i>R.monasensis</i>                                                | 7                                | 3.15                 |
| Ap + <i>Theileria</i> spp.                                              | 2                                | 0.90                 |
| Ap + <i>Hepatozoon</i> spp.                                             | 1                                | 0.45                 |
| Ba/Bg/ <i>Bo.bavar/Bmiy</i> + Ap                                        | 30                               | 13.51                |
| <b>Number of ticks analyzed</b>                                         | <b>222</b>                       |                      |

Abbreviations: *B.*, *Borrelia*; *R.*, *Rickettsia*; *Ap*, *Anaplasma phagocytophilum*; *Nm*, *Neoehrlichia mikurensis*. <sup>a</sup> Obtained from supplementary table 1 of Borsan et al.,2021 [28].
